# Supplementary material for: Distribution of Wheat-Infecting Viruses and Genetic Variability of Wheat Streak Mosaic Virus and Barley Stripe Mosaic Virus in Kazakhstan
Source: MDPI journal article supplement (doi:10.3390/v16010096), 2024-01-08

**WSMV-CP-274 Primer set for WSMV — CP — 274 bp(this study)**

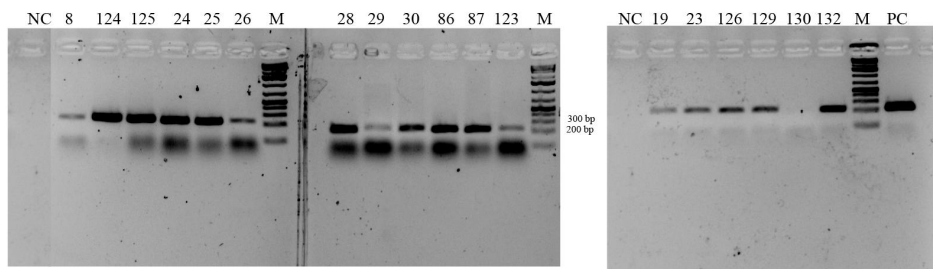

- 1.5% agarose gel
- M: 1 kb plus marker
- NC: Negative control
- PC: Positive control of WSMV

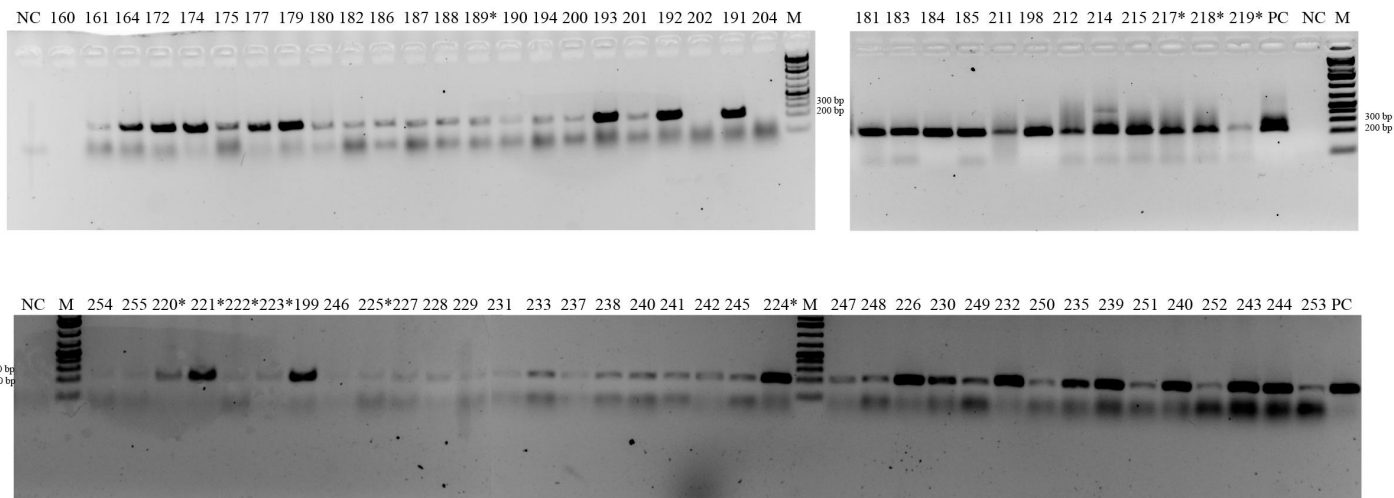

\* positive samples for WSMV and BSMV

**LAMP primer sets for WSMV — CP (this study)**

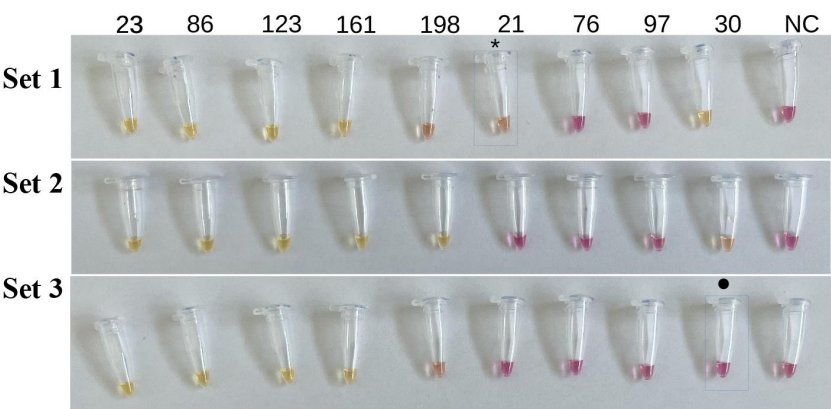

- \* - False positive
- - False negative
- NC — Negative control

**BSMV-γB-134 Primer set for BSMV — γB protein — 134 bp (this study)**

- 1.5% agarose gel
- M: 1 kb plus marker
- NC: Negative control
- PC: Positive control of BSMV

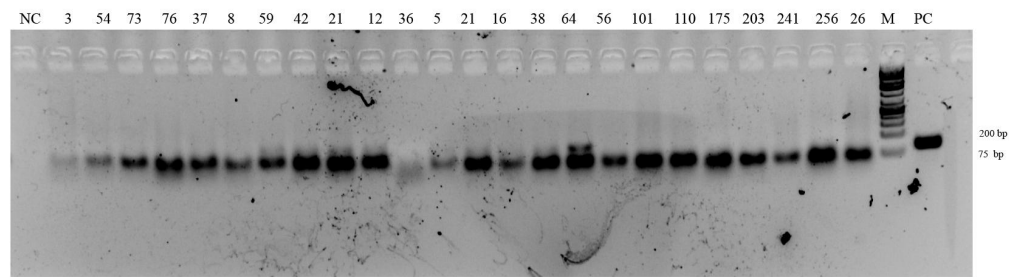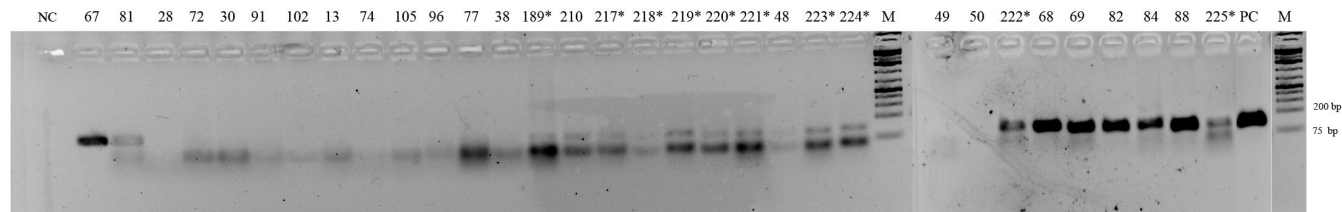

\* positive samples for WSMV and BSMV

**TGB2 Primer set for BSMV — γB protein— 397 bp (Zarzynska et al. 2014)**

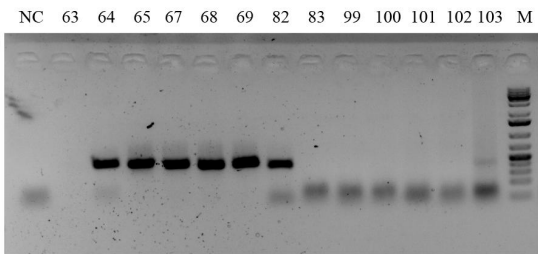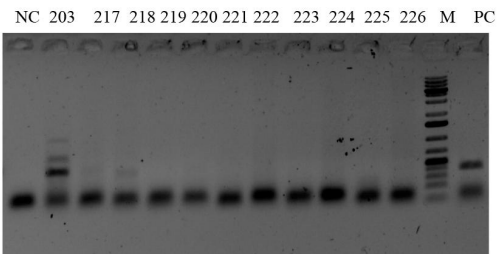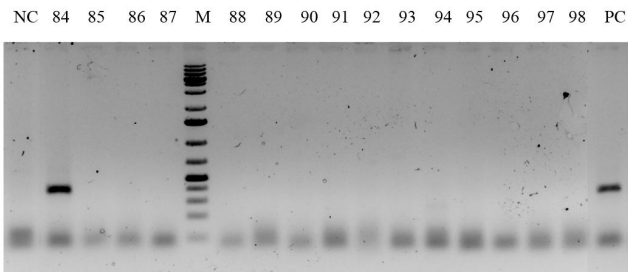

- 1.5% agarose gel
- M: 1 kb plus marker
- NC: Negative control
- PC: Positive control of WSMV

## WS-8166-8909 Primer set for WSMV — CP — 750 bp (Kudela et al. 2008)

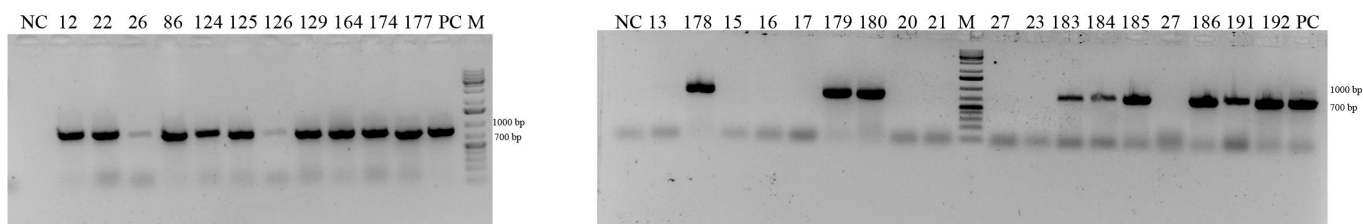

- 1.5% agarose gel
- M: 1 kb plus marker
- NC: Negative control
- PC: Positive control of WSMV

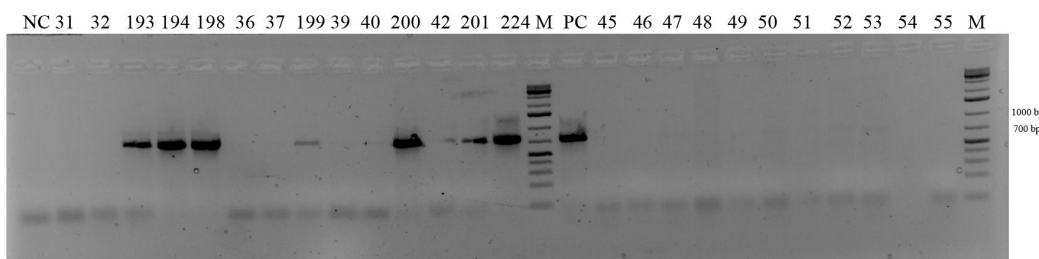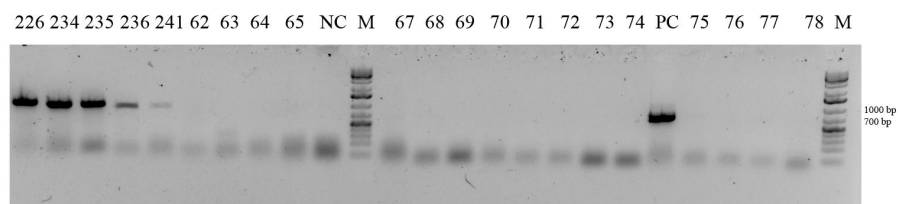

## WSMV Primer set for WSMV — CP — 720 bp (Byamukama et al. 2016)

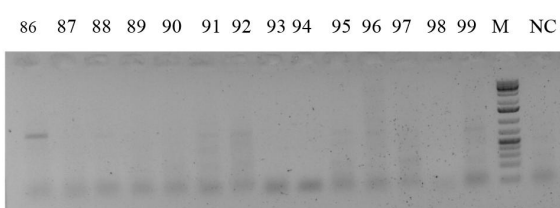

- 1.5% agarose gel
- M: 1 kb plus marker
- NC: Negative control
- PC: Positive control of WSMV

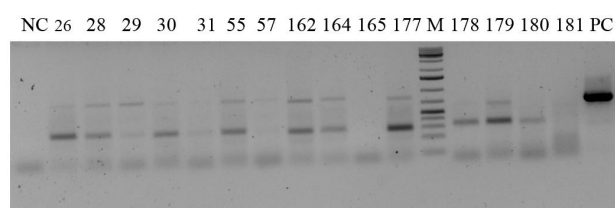

Supplement: s1 [file s1]
