# Supplementary material for: Distribution of Wheat-Infecting Viruses and Genetic Variability of Wheat Streak Mosaic Virus and Barley Stripe Mosaic Virus in Kazakhstan
Source: MDPI journal article supplement (doi:10.3390/v16010096), 2024-01-08
Supplement: s1 [file s1]

**Table S1. Wheat streak mosaic virus (WSMV) and barley stripe mosaic virus (BSMV) isolates obtained from GenBank and used in sequence analysis**

| WSMV, BSMV *<br>isolates | Accession number | Geographic origin                     | Type              | Reference  |
|--------------------------|------------------|---------------------------------------|-------------------|------------|
| KZ57                     | OP793649         | Kazakhstan, Kostanay,<br>Central Asia | coat protein gene | This study |
| KZ72                     | OP793650         | Kazakhstan, Kostanay,<br>Central Asia | coat protein gene | This study |
| KZ73                     | OP793651         | Kazakhstan, Kostanay,<br>Central Asia | coat protein gene | This study |
| KZ69                     | OP793652         | Kazakhstan, Kostanay,<br>Central Asia | coat protein gene | This study |
| KZ58                     | OP793653         | Kazakhstan, Kostanay,<br>Central Asia | coat protein gene | This study |
| KZ70                     | OP793654         | Kazakhstan, Kostanay,<br>Central Asia | coat protein gene | This study |
| KZ48                     | OP793655         | Kazakhstan, Aktobe,<br>Central Asia   | coat protein gene | This study |
| KZ49                     | OP793656         | Kazakhstan, Aktobe,<br>Central Asia   | coat protein gene | This study |
| KZ62                     | OP793657         | Kazakhstan, Kostanay,<br>Central Asia | coat protein gene | This study |
| KZ64                     | OP793658         | Kazakhstan, Kostanay,<br>Central Asia | coat protein gene | This study |
| KZ63                     | OP793659         | Kazakhstan, Kostanay,<br>Central Asia | coat protein gene | This study |
| KZ60                     | OP793660         | Kazakhstan, Kostanay,<br>Central Asia | coat protein gene | This study |
| KZ68                     | OP793661         | Kazakhstan, Kostanay,<br>Central Asia | coat protein gene | This study |
| KZ90                     | OP793663         | Kazakhstan, Aktobe,<br>Central Asia   | coat protein gene | This study |
| KZ93                     | OP793664         | Kazakhstan, Aktobe,<br>Central Asia   | coat protein gene | This study |
| KZ94                     | OP793665         | Kazakhstan, Aktobe,<br>Central Asia   | coat protein gene | This study |
| KZ96                     | OP793666         | Kazakhstan, Aktobe,<br>Central Asia   | coat protein gene | This study |
| KZ99                     | OP793667         | Kazakhstan, Aktobe,<br>Central Asia   | coat protein gene | This study |
| KZ103                    | OP793668         | Kazakhstan, Aktobe,<br>Central Asia   | coat protein gene | This study |
| KZ108                    | OP793669         | Kazakhstan, Aktobe,<br>Central Asia   | coat protein gene | This study |
| KZ104                    | OP793670         | Kazakhstan, Aktobe,<br>Central Asia   | coat protein gene | This study |
| KZ88                     | OP793671         | Kazakhstan, Aktobe,<br>Central Asia   | coat protein gene | This study |

|            |          |                                              |                    |                         |
|------------|----------|----------------------------------------------|--------------------|-------------------------|
| KZ107      | OP793672 | Kazakhstan, Aktobe,<br>Central Asia          | coat protein gene  | This study              |
| KZ2 *      | OP793673 | Kazakhstan, Central Asia                     | $\gamma$ B protein | This study              |
| KZ3 *      | OP793674 | Kazakhstan, Central Asia                     | $\gamma$ B protein | This study              |
| KZ4 *      | OP793675 | Kazakhstan, Central Asia                     | $\gamma$ B protein | This study              |
| KZ7 *      | OP793676 | Kazakhstan, Central Asia                     | $\gamma$ B protein | This study              |
| KZ8 *      | OP793677 | Kazakhstan, Central Asia                     | $\gamma$ B protein | This study              |
| KZ6 *      | OP793678 | Kazakhstan, Central Asia                     | $\gamma$ B protein | This study              |
| Beh2       | MN901877 | Iran,Khuzistan, Behbahan<br>,Asia            | coat protein gene  | Masumi,M. et al.        |
| Dezful     | MN901874 | Iran,Khuzistan, Dezful,<br>Asia              | coat protein gene  | Masumi,M. et al.        |
| Lolium     | MN901873 | Iran,Khuzistan, Andimeshk<br>Asia            | coat protein gene  | Masumi,M. et al.        |
| Beht       | MN901876 | Iran, Khuzistan, Behbahan<br>Asia            | coat protein gene  | Masumi,M. et al.        |
| Beh1       | MN901875 | Iran,Khuzistan, Behbahan<br>Asia             | coat protein gene  | Masumi,M. et al.        |
| Behbahan   | MN901878 | Iran, Khuzistan, Behbahan<br>Asia            | coat protein gene  | Masumi,M. et al.        |
| Chen       | MN901896 | Iran, Khorasan, Chenaran<br>Asia             | coat protein gene  | Masumi,M. et al.        |
| Neyshabour | MN901895 | Iran,Khorasan, Neyshabour<br>Asia            | coat protein gene  | Masumi,M. et al.        |
| FASA-E     | MN901897 | Iran,Fars, Fasa<br>Asia                      | coat protein gene  | Masumi,M. et al.        |
| Azkh132    | MN901881 | Iran,West-Azarbayejan,<br>Azarshahr<br>Asia  | coat protein gene  | Masumi,M. et al.        |
| Azgh132    | MN901880 | Iran, West-Azarbayejan,<br>Azarshahr<br>Asia | coat protein gene  | Masumi,M. et al.        |
| Azsh14     | MN901879 | Iran,West-Azarbayejan,<br>Azarshahr<br>Asia  | coat protein gene  | Masumi,M. et al.        |
| Miandoab   | MN901882 | Iran, West-Azarbayejan,<br>Miandoab<br>Asia  | coat protein gene  | Masumi,M. et al.        |
| 994        | U54567   | USA,Oklahoma<br>America                      | coat protein gene  | Sherwood,J.L.<br>et al. |
| KY0074     | AF511623 | USA,Kentucky<br>America                      | polypeptide gene   | Stenger,D.C. et al.     |

|         |          |                             |                  |                     |
|---------|----------|-----------------------------|------------------|---------------------|
| KY00    | AF511622 | USA,Kentucky<br>America     | polyprotein gene | Stenger,D.C. et al. |
| SD96    | AF511641 | USA,South Dakota<br>America | polyprotein gene | Stenger,D.C. et al. |
| IHC     | AF511620 | Canada<br>America           | polyprotein gene | Stenger,D.C. et al. |
| PV106JM | AF511638 | USA,Ohio<br>America         | polyprotein gene | Stenger,D.C. et al. |
| EW95    | AF511603 | USA,Kansas<br>America       | polyprotein gene | Stenger,D.C. et al. |
| CM93    | AF511600 | USA,Kansas<br>America       | polyprotein gene | Stenger,D.C. et al. |
| H94PM   | AF511610 | USA,Kansas<br>America       | polyprotein gene | Stenger,D.C. et al. |
| OK98    | AF511633 | USA,Oklahoma<br>America     | polyprotein gene | Stenger,D.C. et al. |
| CO85    | AF511601 | USA,Colorado<br>America     | polyprotein gene | Stenger,D.C. et al. |
| MO99B   | AF511628 | USA,Missouri<br>America     | polyprotein gene | Stenger,D.C. et al. |
| MO99A   | AF511627 | USA,Missouri<br>America     | polyprotein gene | Stenger,D.C. et al. |
| GY93    | AF511607 | USA,Kansas<br>America       | polyprotein gene | Stenger,D.C. et al. |
| H95LB   | AF511613 | USA,Kansas<br>America       | polyprotein gene | Stenger,D.C. et al. |
| TX96    | AF511642 | USA,Texas<br>America        | polyprotein gene | Stenger,D.C. et al. |
| H94USDA | AF511612 | USA,Kansas<br>America       | polyprotein gene | Stenger,D.C. et al. |
| H94S    | AF511611 | USA,Kansas<br>America       | polyprotein gene | Stenger,D.C. et al. |
| RO95    | AF511640 | USA,Kansas<br>America       | polyprotein gene | Stenger,D.C. et al. |
| ND      | AF511631 | USA,North Dakota<br>America | polyprotein gene | Stenger,D.C. et al. |
| HM93    | AF511616 | USA,Kansas<br>America       | polyprotein gene | Stenger,D.C. et al. |
| GH95    | AF511605 | USA,Kansas<br>America       | polyprotein gene | Stenger,D.C. et al. |

|          |          |                                                     |                   |                         |
|----------|----------|-----------------------------------------------------|-------------------|-------------------------|
| H81      | AF511608 | USA,Kansas<br>America                               | polyprotein gene  | Stenger,D.C. et al.     |
| FO93     | AF511604 | USA,Kansas<br>America                               | polyprotein gene  | Stenger,D.C. et al.     |
| CL93     | AF511599 | USA,Kansas<br>America                               | polyprotein gene  | Stenger,D.C. et al.     |
| PV91H    | AF511639 | USA,Kansas<br>America                               | polyprotein gene  | Stenger,D.C. et al.     |
| KM93     | AF511621 | USA,Kansas<br>America                               | polyprotein gene  | Stenger,D.C. et al.     |
| S81D     | AF511596 | USA,Nebraska<br>America                             | polyprotein gene  | Stenger,D.C. et al.     |
| H88      | AF511609 | USA,Kansas<br>America                               | polyprotein gene  | Stenger,D.C. et al.     |
| BT95     | AF511597 | USA,Kansas<br>America                               | polyprotein gene  | Stenger,D.C. et al.     |
| PN95     | AF511636 | USA,Kansas<br>America                               | polyprotein gene  | Stenger,D.C. et al.     |
| NE96     | AF511632 | USA,Nebraska<br>America                             | polyprotein gene  | Stenger,D.C. et al.     |
| HV91     | AF511617 | USA,Kansas<br>America                               | polyprotein gene  | Stenger,D.C. et al.     |
| LG92     | AF511626 | USA,Kansas<br>America                               | polyprotein gene  | Stenger,D.C. et al.     |
| TAMU     | U54574   | USA,Texas<br>America                                | coat protein gene | Sherwood,J.L.<br>et al. |
| sidney   | U54573   | USA,Nebraska<br>America                             | coat protein gene | Sherwood,J.L.<br>et al. |
| PL95     | AF511635 | USA,Kansas<br>America                               | polyprotein gene  | Stenger,D.C. et al.     |
| LC95     | AF511625 | USA,Kansas<br>America                               | polyprotein gene  | Stenger,D.C. et al.     |
| KY0083SV | AF511624 | USA,Kentucky<br>America                             | polyprotein gene  | Stenger,D.C. et al.     |
| pv57     | U53604   | USA(American type<br>culture collection)<br>America | coat protein gene | Sherwood,J.L.<br>et al. |
| OSU      | U54571   | USA<br>America                                      | coat protein gene | Sherwood,J.L.<br>et al. |
| pv91     | U54568   | USA(American type<br>culture collection)            | coat protein gene | Sherwood,J.L.<br>et al. |

|            |          |                                       |                   |                      |
|------------|----------|---------------------------------------|-------------------|----------------------|
|            |          | America                               |                   |                      |
| ATCC PV91  | FJ695511 | USA(American type culture collection) | coat protein gene | Gadiou,S. et al.     |
|            |          | America                               |                   |                      |
| ATCC PV57  | FJ695512 | USA(American type culture collection) | coat protein gene | Gadiou,S. et al.     |
|            |          | America                               |                   |                      |
| Agdia      | FJ695510 | USA                                   | coat protein gene | Gadiou,S. et al.     |
|            |          | America                               |                   |                      |
| OSU        | AF511634 | USA,unknown                           | polyprotein gene  | Stenger,D.C. et al.  |
|            |          | America                               |                   |                      |
| GO93       | AF511606 | USA,Kansas                            | polyprotein gene  | Stenger,D.C. et al.  |
|            |          | America                               |                   |                      |
| CO87       | AF511602 | USA,Colorado                          | polyprotein gene  | Stenger,D.C. et al.  |
|            |          | America                               |                   |                      |
| PV57       | AF511595 | USA,Kansas                            | polyprotein gene  | Stenger,D.C. et al.  |
|            |          | America                               |                   |                      |
| PV106H     | AF511637 | USA,Ohio                              | polyprotein gene  | Stenger,D.C. et al.  |
|            |          | America                               |                   |                      |
| MO00       | AF511629 | USA,Missouri                          | polyprotein gene  | Stenger,D.C. et al.  |
|            |          | America                               |                   |                      |
| WO93       | AF511644 | USA,Ohio                              | polyprotein gene  | Stenger,D.C. et al.  |
|            |          | America                               |                   |                      |
| CK93       | AF511598 | USA,Kansas                            | polyprotein gene  | Stenger,D.C. et al.  |
|            |          | America                               |                   |                      |
| Washington | AF034415 | USA                                   | polyprotein gene  | Stenger,D.C. et al.  |
|            |          | America                               |                   |                      |
| 1256       | KC152466 | Brazil                                | coat protein gene | Mar,T.B. et al.      |
|            |          | America                               |                   |                      |
| 912        | KC152462 | Brazil                                | coat protein gene | Mar,T.B. et al.      |
|            |          | America                               |                   |                      |
| 1254       | KC152465 | Brazil                                | coat protein gene | Mar,T.B. et al.      |
|            |          | America                               |                   |                      |
| 1233       | KC152464 | Brazil                                | coat protein gene | Mar,T.B. et al.      |
|            |          | America                               |                   |                      |
| 915        | KC152463 | Brazil                                | coat protein gene | Mar,T.B. et al.      |
|            |          | America                               |                   |                      |
| 486        | KC020196 | Brazil                                | coat protein gene | Mar,T.B. et al.      |
|            |          | America                               |                   |                      |
| 964        | U54570   | USA,Oklahoma                          | coat protein gene | Sherwood,J.L. et al. |
|            |          | America                               |                   |                      |

|              |          |                                          |                   |                         |
|--------------|----------|------------------------------------------|-------------------|-------------------------|
| Colorado     | U54572   | USA,Colorado<br>America                  | coat protein gene | Sherwood,J.L.<br>et al. |
| Gibson       | DQ888803 | Australia<br>Australia                   | coat protein gene | Dwyer,G.I. et al.       |
| Mt. Burdett  | DQ888801 | Australia<br>Australia                   | coat protein gene | Dwyer,G.I. et al.       |
| Ginninderra  | DQ462279 | Australia<br>Australia                   | coat protein gene | Dwyer,G.I. et al.       |
| SP-6         | DQ462277 | Australia<br>Australia                   | coat protein gene | Dwyer,G.I. et al.       |
| Kondonin     | DQ888805 | Australia<br>Australia                   | coat protein gene | Dwyer,G.I. et al.       |
| partial cds  | AY858546 | Australia<br>Australia                   | coat protein gene | Jones,R.A.C. et al.     |
| SP-1         | DQ462278 | Australia<br>Australia                   | coat protein gene | Dwyer,G.I. et al.       |
| SP-5         | DQ462276 | Australia<br>Australia                   | coat protein gene | Dwyer,G.I. et al.       |
| Galong       | DQ888804 | Australia<br>Australia                   | coat protein gene | Dwyer,G.I. et al.       |
| Yerritup     | DQ888802 | Australia<br>Australia                   | coat protein gene | Dwyer,G.I. et al.       |
| Robatm       | MN901894 | Iran,Khorasan,<br>Robatmiandasht<br>Asia | coat protein gene | Masumi,M. et al.        |
| pp2          | KY419574 | Czech Republic<br>Europe                 | coat protein gene | Singh,K. and Kundu,J.K. |
| pp1          | KY419573 | Czech Republic<br>Europe                 | coat protein gene | Singh,K. and Kundu,J.K. |
| ar1          | KY419572 | Czech Republic<br>Europe                 | coat protein gene | Singh,K. and Kundu,J.K. |
| WSMV-UA-2017 | MK167470 | Ukraine<br>Europe                        | coat protein gene | Snihur,H. et al.        |
| Jbajgah      | MN901893 | Iran,Fars, Bajagh<br>Asia                | coat protein gene | Masumi,M. et al.        |
| Toskana      | FJ606885 | Italy<br>Europe                          | coat protein gene | Gadiou,S. et al.        |
| Burgund      | FJ606884 | Italy<br>Europe                          | coat protein gene | Gadiou,S. et al.        |

|             |          |                          |                                  |                   |
|-------------|----------|--------------------------|----------------------------------|-------------------|
| HUBA3       | MT780553 | Hungary<br>Europe        | Polyprotein/coat protein<br>gene | Pasztor,G. et al. |
| HUUS3       | MT780561 | Hungary<br>Europe        | Polyprotein/coat protein<br>gene | Pasztor,G. et al. |
| HUUS2       | MT780560 | Hungary<br>Europe        | Polyprotein/coat protein<br>gene | Pasztor,G. et al. |
| HUUS8       | MT780566 | Hungary<br>Europe        | Polyprotein/coat protein<br>gene | Pasztor,G. et al. |
| HUUS1       | MT780559 | Hungary<br>Europe        | Polyprotein/coat protein<br>gene | Pasztor,G. et al. |
| HUBA8       | MT780558 | Hungary<br>Europe        | Polyprotein/coat protein<br>gene | Pasztor,G. et al. |
| HUBA6       | MT780556 | Hungary<br>Europe        | Polyprotein/coat protein<br>gene | Pasztor,G. et al. |
| HUBA2       | MT780552 | Hungary<br>Europe        | Polyprotein/coat protein<br>gene | Pasztor,G. et al. |
| HUBA5       | MT780555 | Hungary<br>Europe        | Polyprotein/coat protein<br>gene | Pasztor,G. et al. |
| WSMVcz1     | FJ216408 | Czech Republic<br>Europe | polyprotein                      | Gadiou,S. et al.  |
| Turkei      | FJ606886 | Turkey<br>Europe         | coat protein gene                | Gadiou,S. et al.  |
| SK344       | FJ613358 | Slovakia<br>Europe       | polyprotein                      | Gadiou,S. et al.  |
| SlastJR     | FJ216414 | Czech Republic<br>Europe | polyprotein                      | Gadiou,S. et al.  |
| Policko-CRI | FJ216412 | Czech Republic<br>Europe | polyprotein                      | Gadiou,S. et al.  |
| PoleR       | FJ216410 | Czech Republic<br>Europe | polyprotein                      | Gadiou,S. et al.  |
| KromJR      | FJ216413 | Czech Republic<br>Europe | polyprotein                      | Gadiou,S. et al.  |
| Podousy     | FJ216411 | Czech Republic<br>Europe | polyprotein                      | Gadiou,S. et al.  |
| KosHJR      | FJ216409 | Czech Republic<br>Europe | polyprotein                      | Gadiou,S. et al.  |
| SK512       | FJ613359 | Slovakia<br>Europe       | polyprotein                      | Gadiou,S. et al.  |
| HUUS6       | MT780564 | Hungary<br>Europe        | Polyprotein/coat protein<br>gene | Pasztor,G. et al. |

|                |          |                                         |                                  |                                    |
|----------------|----------|-----------------------------------------|----------------------------------|------------------------------------|
| HUUS7          | MT780565 | Hungary<br>Europe                       | Polyprotein/coat protein<br>gene | Pasztor,G. et al.                  |
| HUUS4          | MT780562 | Hungary<br>Europe                       | Polyprotein/coat protein<br>gene | Pasztor,G. et al.                  |
| HUUS9          | MT780567 | Hungary<br>Europe                       | Polyprotein/coat protein<br>gene | Pasztor,G. et al.                  |
| HUBA4          | MT780554 | Hungary<br>Europe                       | Polyprotein/coat protein<br>gene | Pasztor,G. et al.                  |
| HUBA7          | MT780557 | Hungary<br>Europe                       | Polyprotein/coat protein<br>gene | Pasztor,G. et al.                  |
| HUBA1          | MT260879 | Hungary<br>Europe                       | Polyprotein/coat protein<br>gene | Pasztor,G. et al.                  |
| Bodycek        | KY419571 | Czech Republic<br>Europe                | coat protein gene                | Singh,K. and Kundu,J.K.            |
| Avenue         | KY419570 | Czech Republic<br>Europe                | coat protein gene                | Singh,K. and Kundu,J.K.            |
| HUUS5          | MT780563 | Hungary<br>Europe                       | Polyprotein/coat protein<br>gene | Pasztor,G. et al.                  |
| Hymack         | KY419569 | Czech Republic<br>Europe                | coat protein gene                | Singh,K. and Kundu,J.K.            |
| Turondot       | KY419568 | Czech Republic<br>Europe                | coat protein gene                | Singh,K. and Kundu,J.K.            |
| Ukraine-Ep-18  | MH523357 | Ukraine<br>Europe                       | coat protein gene                | Mishchenko,L.T. and<br>Dunich,A.A. |
| Ukraine-Mal-18 | MH523356 | Ukraine<br>Europe                       | coat protein gene                | Mishchenko,L.T. and<br>Dunich,A.A. |
| Qazvin         | MN901892 | Iran,Qazvin, Qazvin<br>Asia             | coat protein gene                | Masumi,M. et al.                   |
| Zanjan         | MN901891 | Iran,Zanjan, Zanjan<br>Asia             | coat protein gene                | Masumi,M. et al.                   |
| FASAW          | MN901885 | Iran,Fars, Fasa<br>Asia                 | coat protein gene                | Masumi,M. et al.                   |
| Sedeh          | MN901884 | Iran,Fars, Sedeh<br>Asia                | coat protein gene                | Masumi,M. et al.                   |
| ShahrK         | MN901883 | Iran,Chaharmahal,<br>Shahrekord<br>Asia | coat protein gene                | Masumi,M. et al.                   |
| Zan132         | MN901890 | Iran,Zanjan, Zanjan<br>Asia             | coat protein gene                | Masumi,M. et al.                   |
| Kab52          | MN901889 | Iran,Isfahan, Kabootarabad              | coat protein gene                | Masumi,M. et al.                   |



|                 |             |                       |                         |                           |
|-----------------|-------------|-----------------------|-------------------------|---------------------------|
|                 |             | Asia                  |                         |                           |
| Isfahan         | MN901886    | Iran,Isfahan, Isfahan | coat protein gene       | Masumi,M. et al.          |
|                 |             | Asia                  |                         |                           |
| Abargoo         | MN901887    | Iran,Yazd, Abargoo    | coat protein gene       | Masumi,M. et al.          |
|                 |             | Asia                  |                         |                           |
| Azna            | MN901888    | Iran, Lorestan, Azna  | coat protein gene       | Masumi,M. et al.          |
|                 |             | Asia                  |                         |                           |
| Qasr Ibrim*     | KJ433979    | Qasr Ibrim, Egypt     | complete sequence       | Smith,O. et al.           |
|                 |             | Africa                |                         |                           |
| China strain*   | AY787207.1  | China                 | complete sequence       | Sun,X. et al.             |
|                 |             | Asia                  |                         |                           |
| Type*           | M16576.1    | USA                   | unknown protein         | Gustafson,G. et al.       |
|                 |             | America               |                         |                           |
| Complete genome | NC_003478.1 | USA                   | complete sequence       | Gustafson,G. et al.       |
|                 |             | America               |                         |                           |
| ND18*           | M16577.1    | USA                   | unknown protein         | Gustafson,G. et al.       |
|                 |             | America               |                         |                           |
| Complete genome | X52774.1    | Argentina             | unnamed protein product | Kozlov,Yu.V. et al.       |
|                 |             | America               |                         |                           |
| XJ*             | KJ746473.1  | China                 | complete sequence       | Yuan,C., Hu,Y. and Li,D.  |
|                 |             | Asia                  |                         |                           |
| Norwich*        | JF803285.1  | Norwich,England       | complete sequence       | Lee,M.Y. and Jackson,A.O. |
|                 |             |                       |                         |                           |
| De-M*           | KY615800.1  | Germany               | complete sequence       | Zarzynska-Nowak,A. et al. |
|                 |             | Europe                |                         |                           |
| R*              | KY615798.1  | Poland                | complete sequence       | Zarzynska-Nowak,A. et al. |
|                 |             | Europe                |                         |                           |
| M*              | KY615799.1  | Poland                | complete sequence       | Zarzynska-Nowak,A. et al. |
|                 |             | Europe                |                         |                           |
| M/R*            | KY615806.1  | Poland                | complete sequence       | Zarzynska-Nowak,A. et al. |
|                 |             | Europe                |                         |                           |
